# Supplementary material for: Methylobacterium, a major component of the culturable bacterial endophyte community of wild Brassica seed
Source: PeerJ. 2020 Jul 10;8:e9514. doi: 10.7717/peerj.9514 (PMC7357558; doi:10.7717/peerj.9514)
Supplement: Supplemental Information 3 [file peerj-08-9514-s003.xlsx]

## Sheet: Raw data-plant growth promotion
			Treatment	Species	Fresh plant weight (g)	Rep			Mean fresh plant weight (g)
			B82	Methylobacterium fujisawaense	1.4674	1			Methylobacterium fujisawaense	1.3304
			B82	Methylobacterium fujisawaense	1.0388	2			Methylobacterium phyllosphaerae	0.883425
			B82	Methylobacterium fujisawaense	1.2048	3			Control	0.693325
			B82	Methylobacterium fujisawaense	1.5578	4
			B82	Methylobacterium fujisawaense	1.2986	5
			B82	Methylobacterium fujisawaense	1.148	6
			B82	Methylobacterium fujisawaense	1.3742	7
			B82	Methylobacterium fujisawaense	1.5536	8
			B64	Methylobacterium phyllosphaerae	0.7968	1
			B64	Methylobacterium phyllosphaerae	0.777	2
			B64	Methylobacterium phyllosphaerae	1.0796	3
			B64	Methylobacterium phyllosphaerae	0.8592	4
			B64	Methylobacterium phyllosphaerae	0.892	5
			B64	Methylobacterium phyllosphaerae	1.0998	6
			B64	Methylobacterium phyllosphaerae	0.7662	7
			B64	Methylobacterium phyllosphaerae	0.7968	8
			Control	n/a	0.531	1
			Control	n/a	0.7422	2
			Control	n/a	0.6996	3
			Control	n/a	0.8254	4
			Control	n/a	0.6888	5
			Control	n/a	0.8018	6
			Control	n/a	0.593	7
			Control	n/a	0.6648	8
